# Supplementary material for: Genome-Wide Identification and Expression Analysis of R2R3-MYB Family Genes Associated with Petal Pigment Synthesis in Liriodendron
Source: MDPI journal article supplement (doi:10.3390/ijms222011291), 2021-10-19
Supplement: s1 [file s1]

Supplementary materials

Table S1 Physical and chemical property prediction, location and exon number of the R2R3-MYB family in *L. chinense*

| Gene ID   | Amino acids (aa) | Molecular weight (Mw: Da) | Isoelectric point (pI) | No. exons | Location   | Gene ID   | Amino acids (aa) | Molecular weight (Mw: Da) | Isoelectric point (pI) | No. exons | Location   |
|-----------|------------------|---------------------------|------------------------|-----------|------------|-----------|------------------|---------------------------|------------------------|-----------|------------|
| Lchi29571 | 194              | 22304.48                  | 10.28                  | 3         | Chr1       | Lchi01130 | 265              | 30209.03                  | 7.09                   | 3         | Chr3       |
| Lchi20781 | 398              | 44290.03                  | 4.61                   | 3         | Chr2       | Lchi16606 | 431              | 48119.95                  | 7.17                   | 4         | Chr10      |
| Lchi20779 | 394              | 43493.48                  | 4.72                   | 3         | Chr10      | Lchi09741 | 272              | 30827.16                  | 7.2                    | 3         | Contig1978 |
| Lchi24392 | 258              | 29059.76                  | 5.07                   | 2         | Contig2089 | Lchi34201 | 244              | 27671.34                  | 7.64                   | 3         | Chr18      |
| Lchi03357 | 204              | 23583.08                  | 5.18                   | 2         | chr14      | Lchi26289 | 385              | 43288.05                  | 7.67                   | 3         | Chr1       |
| Lchi16402 | 263              | 29872.92                  | 5.23                   | 3         | Chr7       | Lchi33480 | 278              | 30249.09                  | 8.02                   | 3         | Chr1       |
| Lchi25489 | 374              | 42157.02                  | 5.35                   | 3         | Chr19      | Lchi04105 | 314              | 35105.65                  | 8.23                   | 3         | Chr15      |
| Lchi04251 | 323              | 34845.93                  | 5.38                   | 2         | Contig108  | Lchi14373 | 217              | 24728.69                  | 8.39                   | 3         | Chr5       |
| Lchi06127 | 331              | 36918.83                  | 5.43                   | 2         | Chr4       | Lchi20676 | 230              | 25979.48                  | 8.56                   | 3         | Chr2       |
| Lchi27169 | 544              | 59738.54                  | 5.47                   | 9         | Chr18      | Lchi20677 | 230              | 25990.5                   | 8.56                   | 3         | Chr12      |
| Lchi19398 | 1374             | 149250.3                  | 5.48                   | 5         | Chr18      | Lchi20451 | 230              | 26004.61                  | 8.56                   | 3         | Chr12      |
| Lchi12010 | 293              | 32759.32                  | 5.52                   | 2         | Chr9       | Lchi24117 | 230              | 26178.79                  | 8.61                   | 2         | Chr3       |
| Lchi32229 | 253              | 29444.76                  | 5.6                    | 3         | Chr8       | Lchi02835 | 238              | 28041.27                  | 8.65                   | 3         | chr12      |
| Lchi33711 | 250              | 28119.06                  | 5.62                   | 2         | Contig2389 | Lchi35141 | 289              | 32279.04                  | 8.7                    | 3         | Contig954  |
| Lchi03619 | 358              | 40411.36                  | 5.62                   | 3         | Chr15      | Lchi04296 | 327              | 36781.33                  | 8.71                   | 2         | Chr6       |
| Lchi24986 | 296              | 33652.96                  | 5.63                   | 3         | Contig2361 | Lchi35153 | 345              | 38643.74                  | 8.72                   | 3         | Chr17      |
| Lchi30781 | 315              | 35108.18                  | 5.67                   | 3         | Chr13      | Lchi13810 | 376              | 42257.1                   | 8.93                   | 2         | Chr16      |
| Lchi13995 | 452              | 50534.56                  | 5.72                   | 11        | Chr4       | Lchi16239 | 227              | 25952.19                  | 8.98                   | 3         | Chr7       |
| Lchi01230 | 367              | 41132.35                  | 5.82                   | 3         | Chr4       | Lchi20068 | 265              | 30915.99                  | 9.02                   | 3         | Chr11      |

| Gene ID   | Amino acids (aa) | Molecular weight (Mw: Da) | Isoelectric point (pI) | No. exons | Location   | Gene ID          | Amino acids (aa) | Molecular weight (Mw: Da) | Isoelectric point (pI) | No. exons | Location   |
|-----------|------------------|---------------------------|------------------------|-----------|------------|------------------|------------------|---------------------------|------------------------|-----------|------------|
| Lchi22393 | 325              | 36408.2                   | 5.89                   | 2         | Chr4       | Lchi25073        | 244              | 27872.04                  | 9.06                   | 2         | Contig2461 |
| Lchi21285 | 221              | 25721.81                  | 5.9                    | 3         | Chr7       | Lchi20890        | 317              | 34767.35                  | 9.08                   | 1         | Chr19      |
| Lchi11983 | 407              | 45065.89                  | 5.95                   | 3         | Contig398  | Lchi15866        | 305              | 34600.58                  | 9.1                    | 2         | Chr7       |
| Lchi07515 | 320              | 36870.28                  | 5.96                   | 3         | Chr2       | Lchi28680        | 287              | 32509.37                  | 9.28                   | 4         | Chr1       |
| Lchi08219 | 337              | 38929.01                  | 5.96                   | 3         | Contig2066 | Lchi00878        | 200              | 22062.99                  | 9.39                   | 3         | Chr15      |
| Lchi02876 | 382              | 41914.61                  | 6.09                   | 3         | Chr4       | Lchi05001        | 278              | 31506.92                  | 9.46                   | 2         | Chr7       |
| Lchi00034 | 451              | 50166.84                  | 6.1                    | 3         | Chr9       | Lchi25305        | 225              | 26180.86                  | 9.49                   | 3         | Chr7       |
| Lchi30558 | 310              | 34851.09                  | 6.12                   | 3         | Chr4       | Lchi02269        | 443              | 49385.46                  | 9.52                   | 4         | Chr4       |
| Lchi14291 | 330              | 37071.28                  | 6.12                   | 3         | Chr1       | <b>Lchi16240</b> | 171              | 19657.22                  | 9.68                   | 2         | Chr2       |
| Lchi08315 | 352              | 39400.1                   | 6.18                   | 2         | Chr8       | <b>Lchi35491</b> | 412              | 46392.84                  | 5.32                   | 2         | Contig519  |
| Lchi33069 | 295              | 32373.1                   | 6.19                   | 3         | Chr6       | <b>Lchi08411</b> | 222              | 24757.26                  | 4.55                   | 2         | Chr2       |
| Lchi23178 | 295              | 32401.16                  | 6.19                   | 3         | Chr2       | <b>Lchi02090</b> | 324              | 36901.78                  | 9.14                   | 2         | chr4       |
| Lchi16280 | 294              | 33562.79                  | 6.19                   | 3         | Chr5       | <b>Lchi22877</b> | 371              | 42650.68                  | 9.15                   | 2         | Chr2       |
| Lchi16028 | 239              | 27647.13                  | 6.2                    | 2         | chr12      | <b>Lchi25771</b> | 127              | 15017.37                  | 9.32                   | 2         | Chr1       |
| Lchi16886 | 345              | 37727.35                  | 6.21                   | 3         | Chr15      | <b>Lchi08781</b> | 395              | 44852.17                  | 9.37                   | 2         | Chr6       |
| Lchi05447 | 266              | 30280.07                  | 6.32                   | 3         | Chr3       | <b>Lchi32813</b> | 552              | 61551.32                  | 5.49                   | 3         | Contig1171 |
| Lchi02910 | 325              | 36515.23                  | 6.34                   | 3         | Chr4       | <b>Lchi33243</b> | 286              | 32232.96                  | 5.5                    | 2         | Contig108  |
| Lchi28129 | 306              | 34491.28                  | 6.37                   | 3         | Chr8       | <b>Lchi15907</b> | 240              | 27001.21                  | 5.86                   | 3         | Chr5       |
| Lchi34315 | 266              | 30145.1                   | 6.41                   | 3         | Chr11      | <b>Lchi08141</b> | 458              | 50747.65                  | 5.87                   | 2         | Chr15      |
| Lchi03530 | 304              | 33601.58                  | 6.44                   | 3         | Chr1       | <b>Lchi19831</b> | 249              | 27873.01                  | 6.31                   | 2         | Chr12      |
| Lchi00655 | 296              | 33284.35                  | 6.45                   | 2         | Contig1049 | <b>Lchi19175</b> | 365              | 40207.57                  | 7.68                   | 3         | Chr17      |

| Gene ID   | Amino acids (aa) | Molecular weight (Mw: Da) | Isoelectric point (pI) | No. exons | Location | Gene ID          | Amino acids (aa) | Molecular weight (Mw: Da) | Isoelectric point (pI) | No. exons | Location   |
|-----------|------------------|---------------------------|------------------------|-----------|----------|------------------|------------------|---------------------------|------------------------|-----------|------------|
| Lchi27955 | 282              | 30629.55                  | 6.51                   | 4         | Chr4     | <b>Lchi28678</b> | 310              | 35813.66                  | 7.62                   | 5         | Chr12      |
| Lchi07497 | 188              | 21707.28                  | 6.52                   | 3         | Chr12    | <b>Lchi02887</b> | 397              | 44433.91                  | 7.1                    | 3         | Chr2       |
| Lchi19646 | 307              | 34370.77                  | 6.54                   | 3         | Chr6     | <b>Lchi16547</b> | 266              | 30576.54                  | 7.08                   | 2         | Contig1833 |
| Lchi28065 | 389              | 42909.8                   | 6.62                   | 3         | Chr7     | <b>Lchi20188</b> | 214              | 24899.1                   | 6.91                   | 2         | Chr19      |
| Lchi23492 | 248              | 27913.64                  | 6.71                   | 2         | Chr11    | <b>Lchi02954</b> | 467              | 52278.8                   | 6.74                   | 12        | Chr2       |
| Lchi14334 | 369              | 40816.95                  | 6.8                    | 2         | Chr11    | <b>Lchi19830</b> | 239              | 27262.52                  | 6.61                   | 2         | Chr13      |
| Lchi01531 | 294              | 31427.94                  | 6.84                   | 2         | Chr10    | <b>Lchi23022</b> | 412              | 44777.88                  | 6.37                   | 2         | Chr10      |
| Lchi28983 | 244              | 27686.29                  | 6.85                   | 3         | Chr19    | <b>Lchi31852</b> | 460              | 51268.46                  | 6.35                   | 3         | Chr18      |
| Lchi06375 | 279              | 31720.32                  | 6.9                    | 3         | Chr9     | <b>Lchi29812</b> | 303              | 34461.57                  | 6.34                   | 2         | chr18      |
| Lchi19649 | 224              | 25268.43                  | 6.97                   | 3         | Chr8     |                  |                  |                           |                        |           |            |

Note: 99 *R2R3-MYB* genes were listed in Table S1, including 76 previously identified genes by wu et al and 22 new genes. Two different fonts were used to distinguish these two groups of genes. The Gene ID of 22 new genes was bolded in Table S1.

**Table S2** Information on the 16 R2R3-MYB TFs

| Gene ID   | Clade | Gene ID   | Clade |
|-----------|-------|-----------|-------|
| Lchi28678 | C29   | Lchi19649 | C31   |
| Lchi33711 | C31   | Lchi20781 | C33   |
| Lchi25771 | C33   | Lchi21285 | C29   |
| Lchi08411 | C31   | Lchi25305 | C29   |
| Lchi35141 | C31   | Lchi25073 | C35   |
| Lchi28983 | C29   | Lchi20779 | C33   |
| Lchi28680 | C29   | Lchi34201 | C29   |
| Lchi01130 | C31   | Lchi19646 | C31   |

Note: Gene ID and clade information of 16 R2R3-MYB TFs used in *cis-acting* elements analysis.

**Table S3** Information of the primer sequences

| Gene ID        | Primer sequences         | Length/bp |
|----------------|--------------------------|-----------|
| <i>EIF3</i> -F | CATCCAATTTCACTTTCGCTCCAC | 25        |
| <i>EIF3</i> -R | AATCACCAGCAGACGAGAAGCA   | 22        |
| Lchi01130-FP   | ACTTGCCGGAATCTGATCCAC    | 21        |
| Lchi01130-RP   | CCATGCTCCAGTAACCTCGT     | 20        |
| Lchi08411-FP   | CGTCGAAGTCCGTCTCAAGCA    | 21        |
| Lchi08411-RP   | ATTGGCAACAGATGGTCCCT     | 20        |
| Lchi19649-FP   | ACCCCTAATAAACCAAGTGCTCT  | 23        |
| Lchi19649-RP   | TCCCTCCGACACAACAAACCC    | 21        |
| Lchi20781-FP   | AGACTTTTCAACCAAGCCGCTCA  | 23        |
| Lchi20781-RP   | CCCCACTCTCTATCTCCTCACC   | 22        |
| Lchi21285-FP   | TCGCAGGTAGAATCCCAGGA     | 20        |
| Lchi21285-RP   | ACTCCATCTCGTCCACCTCG     | 20        |
| Lchi25305-FP   | CTAAGGGCAGGTCTCAAACGA    | 21        |
| Lchi25305-RP   | TTCTTCCCGGCAGTCTACCAG    | 21        |
| Lchi25771-FP   | TGGACAGCAGAAGAAGATCGGA   | 22        |
| Lchi25771-RP   | TCCCACACCGTAATAAGCCTGC   | 22        |
| Lchi28678-FP   | CATCAGCCTCGAACCTTCTCC    | 21        |
| Lchi28678-RP   | AGTCATTCCAATAGCACCTCC    | 22        |
| Lchi28680-FP   | CAACCACAAGGCAGAGTTAGCA   | 22        |
| Lchi28680-RP   | CACCCCAAGCACTAACTCCAC    | 21        |
| Lchi28983-FP   | AAAGTCCTGAAGCCAAAGCCT    | 21        |
| Lchi28983-RP   | GCTCTTCCGTTGCATCTCCAC    | 21        |
| Lchi33711-FP   | TGCTTGCCCAATCCCCACA      | 19        |
| Lchi33711-RP   | GCGCCACGTAGACTTCTCCA     | 20        |
| Lchi35141-FP   | GCCCCTCCAGACAAAGATTCCCT  | 22        |
| Lchi35141-RP   | AATCTTCCAGCATCCCCTCGT    | 21        |

Note: Gene ID and primer sequences of 12 R2R3-MYB TFs used in RT-qPCR assays.

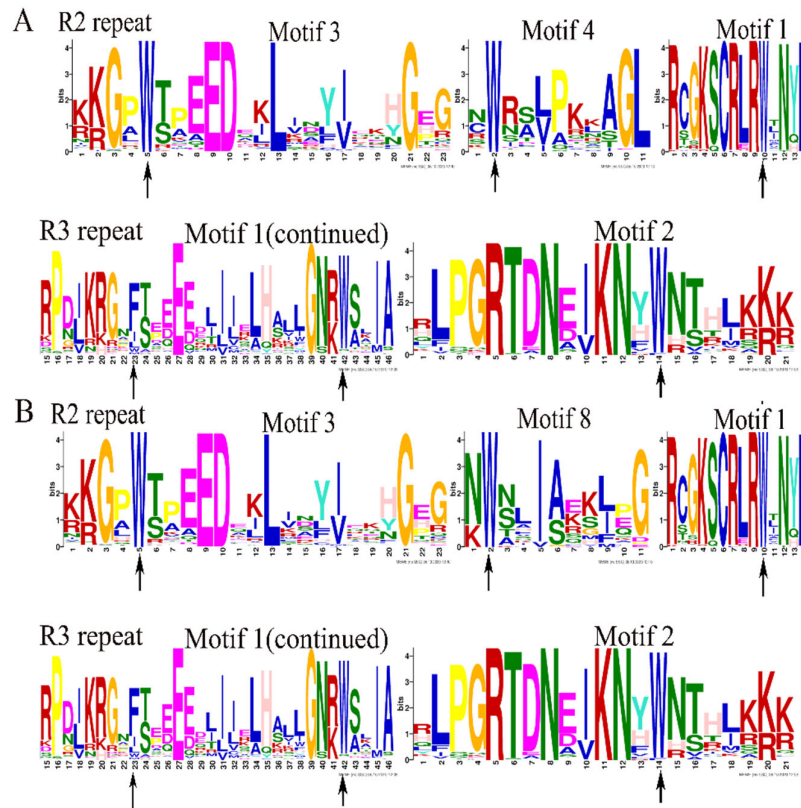

**Supplementary Figure S1.** Motif substitution in the R2 and R3 repeats. A: The R1 and R2 repeats of R2R3-MYB family proteins. The R2 repeat and R3 repeat are composed of motif 3, motif 4, motif 1 and motif 2. B: The new R1 and R2 repeats of R2R3-MYB family proteins. The new R2 repeat and R3 repeat are composed of motif 3, motif 8, motif 1 and motif 2.

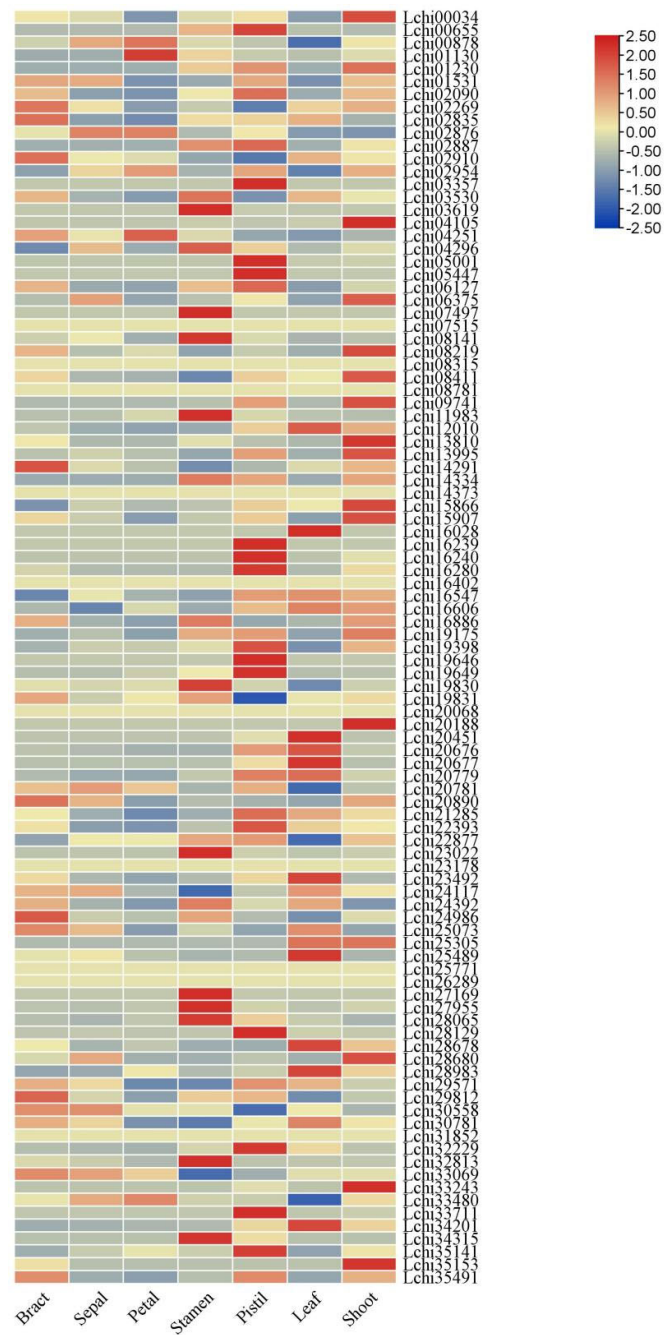

**Supplementary Figure S2.** Heat map of 99 R2R3-MYB genes in different *L. chinense* tissues. These tissues include bract, sepal, petal, stamen, pistil, leaf and shoot.

## Appendix S1 Supplementary methods

### The sequence of *LceIF3*

>*LceIF3*

TCTCCCCCTAGTTTTCCAAAGCTTGCAGGCAGAAATGAAAATAGTCCTCATGTAA  
CCAAAACCTGACTCTCTGCTAGTTTTTCAAGGGCTGAATCTCTTGTTTAGATAAATA  
GAAAAAAGCAGCCAAGGTTCAACACACTGATGAAAAAAGAAAAATCAGTATTG  
GACAAAAAAAATTCTCTCCACAAGGTTTACCTCTTAGAACATTCTCTTAGAACAC  
ACCAACAGTTGATGCTTCAACAGGTGGGCCTCAGCGTTCGGATCCGGATGGAGG  
AATTCTAGAAGAACCCCATGTGGATGACGAAGATCTAGAACCGCTGCCGCCAGA  
AAACGCCGACTTGCGGTCGTCGCTACGCCACTTGTACCAGAATGGGGCGGGCG  
GTTGTCATGCTTGCCCCAACGGTCTGTCTGGAGGTGCGGCTGCACCCGAGCTT  
TCCGTCTTTTACGCCGGAACCTTGGCACATACTTTCCAGATGTGGGTGCTGCTG  
CTGATGCCGCGACAGTGGCAGCCACAGGCTCCACGGGGCGGGGTCCATTGGCCT  
GCTCGGCTGGCCGTGTGAGCGGCTCCGATGTCTTTCTAAGAGAGCTTCTCTCCT  
CAACCGCTCCTTCTCTTCCAATTCTTCTCCCTCTGCCTCTGCCTCTCGGCGATCT  
CATCCAATTTCACTTTCCGCTCCACCTCTTCTTCTTGCCTTTTACGCCTCTTCGT  
GCTTTCGAGCTTCTTCTCTTACGCAGCTTGGTCAGCCGCTCCTCCTCCGATTTT  
ATAAAGAAAAGCAGTTTCCTTTTCTTCTCCCTTTCTGCCTCCGCATAACTATGAG  
CTGCCTGATCCTGTCTCTCTCTCTTTCTTCACTGTGTTATATTCTGCTTCTCGTCTG  
CTGGTGATTCTATTATGCAATATATTCTTGTGTCCAACATCCGGGCAAGCCGATT  
TTTCTCTTGAAGGTCACCTGCATGATGCTGCCTGCTGAGCTCAATTTCTTGCAGCT  
GTTTCATGTTTCATGGAGTATCTTCTTCCACCAGACGCTGTTGAAATGTTGTTGCG  
ATCAAAGGTGCCTCCTCTTCTCTTTTGGCTCTTCCATATAATCCATTGTTTTGGCA  
AGTTTTTGAATTTCTTCTCCATCTCCTGTGCTCTCTGAGTTGTTCACTCAATGCC  
AACTCAATCAAGGTCTGCTTTGTACCTTTTCCCCCTCAATGACTGGCTTCTTTCC  
CTTCTTCTTACGACCCTTCTCGGCTTCTGAAGTAGAGCATGGGCCTCTTCAAGTT  
CCCTCTCCTCTATTTCTCTGCGTATCCTCTGTTCTTCCCTTCTAGTATACTCAGAAG  
CCAGTCTCTTTTGTCTGCCTCCTCAGTAATTTTCTGTAGTTTTATCCTCTTTGACTC  
TTCTTCCCGTTCCATTTCTAGCATCTGCCGTTCTGTCTTCTTCTTGCCTCTCTCAATT  
ATCGATTTTCGGGCAAGTAGTCTTTTGTGCTCTCTATCCACAGTGTCTGCTAACAC  
AGCTAGAGTATCACTTCCAAGCCGAGCTTGCAATGGAGGATAGATCATGCTCCTG  
GCTTTGTTCAAAGATTCCGCAAAAATGGTAAGGTGATCCCGGAGCCTGTCCGAC  
TCAAGATCCATACTACCAAAGAGAACAGCACCCCTTCAAGTGGTCAACTTTTCATG  
GCAACAAAATTATATTTGACGGCATCTACTGAAATTTTCTCCACAACCTGAGAAAT  
CGAAAAAGGGAATCATCCTTGATATGACCTCGATTTTCATGGTTTGATAAACCTG  
TGAAACCTGCTGTAGCACTCTCAAGGCAGCAAGTTTTTCCAGAGCAGGAACATA  
CTGTGATAATTGCACTTCCGGAACAGAAGAAGCTGAAGAAATCTTGCCACCAAG  
CTTAGAGATCTTGGACAACAACGGCTGAACTTTTGACACAAGATCTAATGGGAG  
GAATTCATGTTCTAAAAGATGGAATAGGTCTTTTACTTCTTGTGAGACACATGTCA  
ATACACCTTTGGAGGCCAATTCTGAGAGAAGTGATGATCGTGAAAGCTGCCAGA  
GTTCAAGCTCTGTTGCAATCTTTAGCTGCTCAAATCTGGTATCTAAGTACAGCTGC  
AAACTTTCTGGAGATGACAAGTCAGGTCTATCTTTGGTCTCTGTATTTGTTAAG  
ATTAGCCAAGTGGTTTCGGATAATTTACAAAGCCTCCGAAATTCTGTCTGCTCCGT

TTGTATTGCTTACAGAACTGGAAGGCCCGGTGTGCCGTCATCGCATATAAACCTT  
CTAATTTTGAGTTGTTACGTAAAATTTCTAACACAGTCCTGTATGTCTCCCATAAA  
AATTTGAACCATGGAGTTACAAGCTCCCGGTTCAGACCTATCTCGACCTTTCTCAC  
CACTGACATAGCTTAGCATCAAGTCTTCTGGCCTTTTGTCTGCTTCCAAATCATCA  
ACATCCAAAGCATCTTCCAAGGCTTGCGCCTGGCTTCGAGCTTGCTCCGCCCTCT  
CGGTGGAC

Note: The red labeled sequence is the forward primer position of RT-qPCR; The blue labeled sequence is the reverse primer position of RT-qPCR.
